# Supplementary material for: Effect of Dietary Soy Protein Source on Effluent Water Quality and Growth Performance of Rainbow Trout Reared in a Serial Reuse Water System
Source: MDPI journal article supplement (doi:10.3390/ani13193090), 2023-10-03
Supplement: s1 [file s1]

Supplementary Figures S1–S14

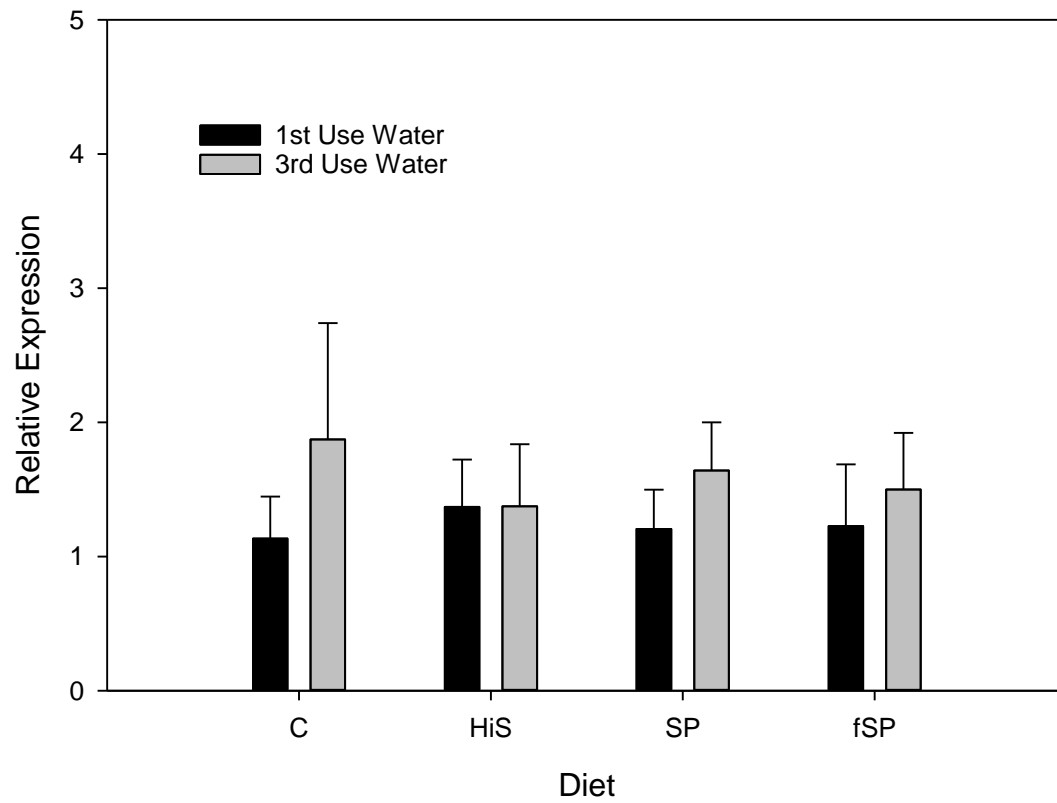

**Figure S1.** Relative expression (versus the reference gene,  $\beta$ -actin) of IRF-1 in gill of rainbow trout fed different experimental feeds and reared in 1<sup>st</sup> use or 3<sup>rd</sup> use water. C = fishmeal control; fSP = fermented soy protein concentrate; HiS = high soybean meal; SP = soy protein concentrate.

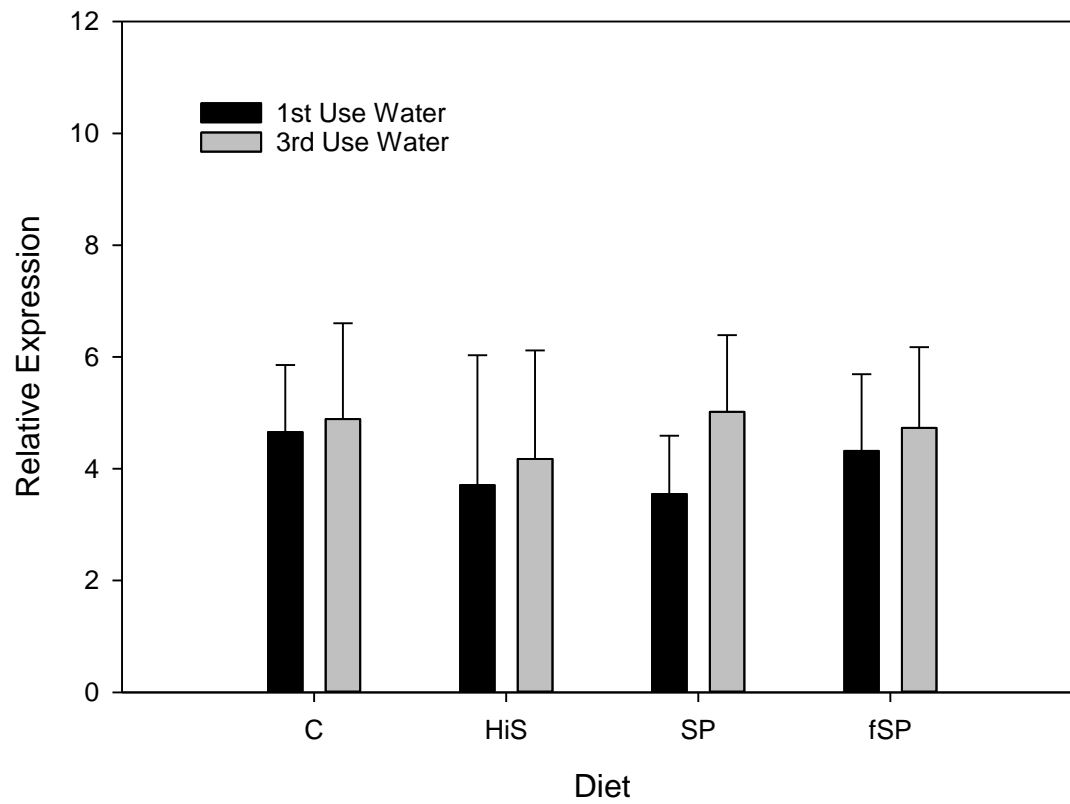

**Figure S2.** Relative expression (versus the reference gene,  $\beta$ -actin) of FK506BP2 in gill of rainbow trout fed different experimental feeds and reared in 1<sup>st</sup> use or 3<sup>rd</sup> use water. C = fishmeal control; fSP = fermented soy protein concentrate; HiS = high soybean meal; SP = soy protein concentrate.

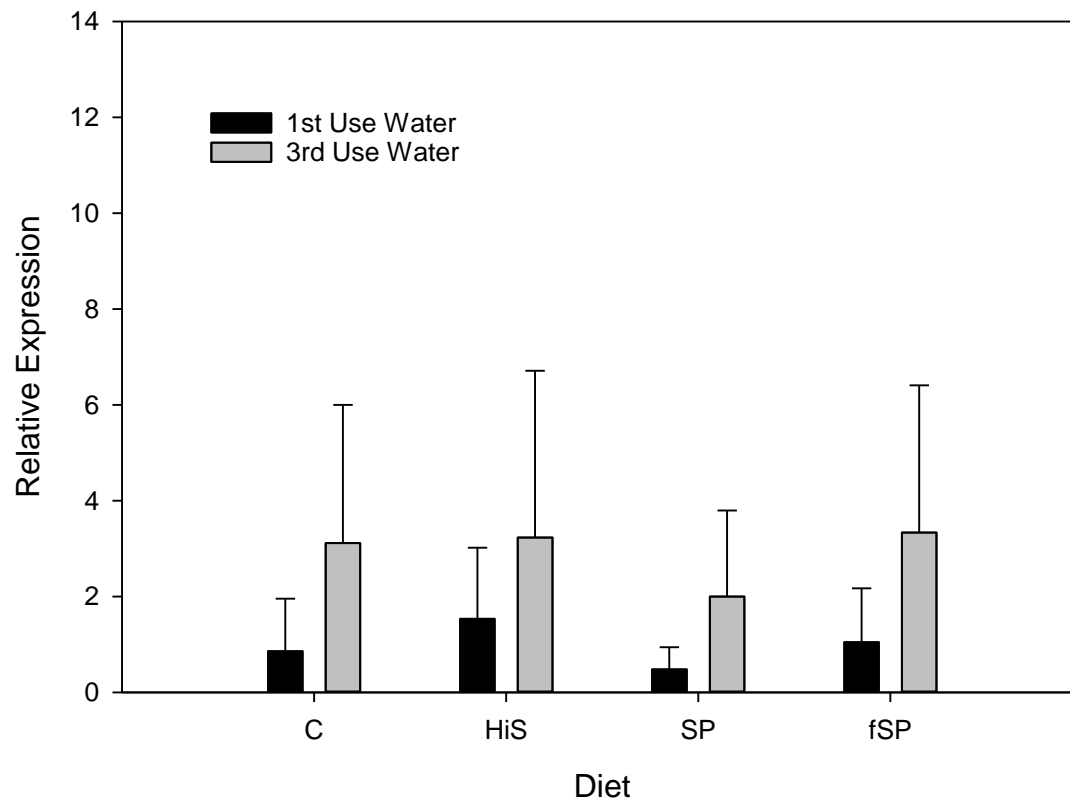

**Figure S3.** Relative expression (versus the reference gene,  $\beta$ -actin) of DIO2 in gill of rainbow trout fed different experimental feeds and reared in 1<sup>st</sup> use or 3<sup>rd</sup> use water. C = fishmeal control; fSP = fermented soy protein concentrate; HiS = high soybean meal; SP = soy protein concentrate.

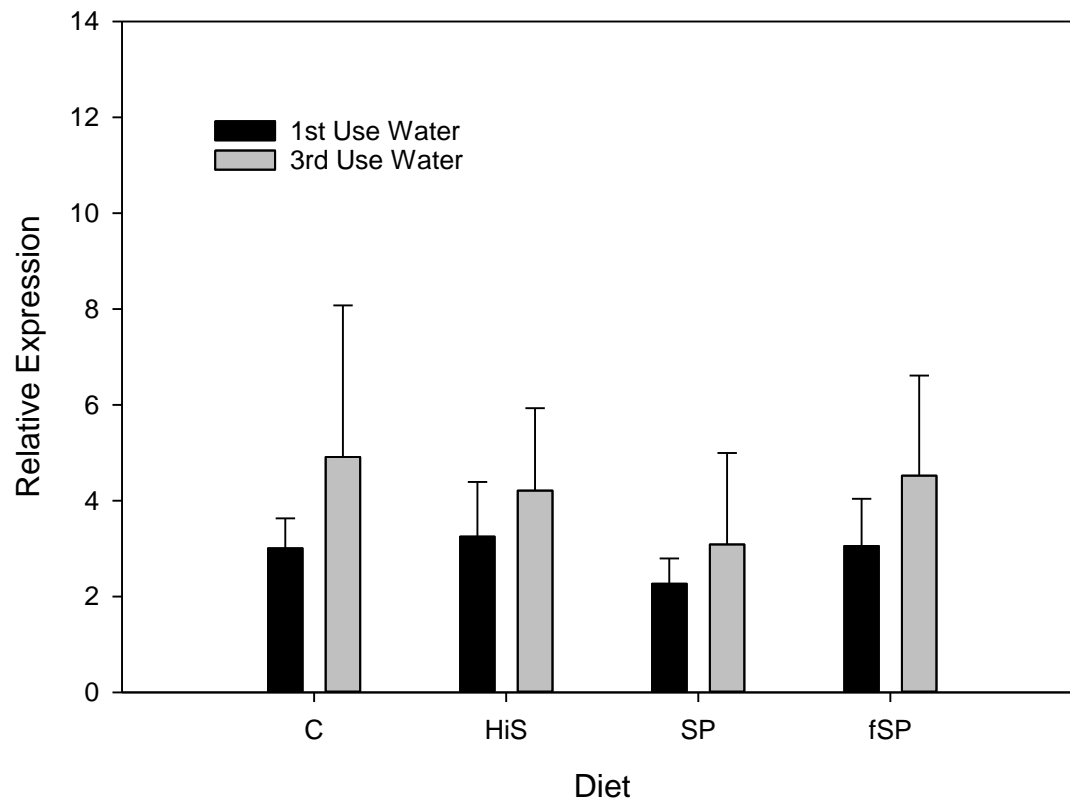

**Figure S4.** Relative expression (versus the reference gene,  $\beta$ -actin) of REGPS in gill of rainbow trout fed different experimental feeds and reared in 1<sup>st</sup> use or 3<sup>rd</sup> use water. C = fishmeal control; fSP = fermented soy protein concentrate; HiS = high soybean meal; SP = soy protein concentrate.

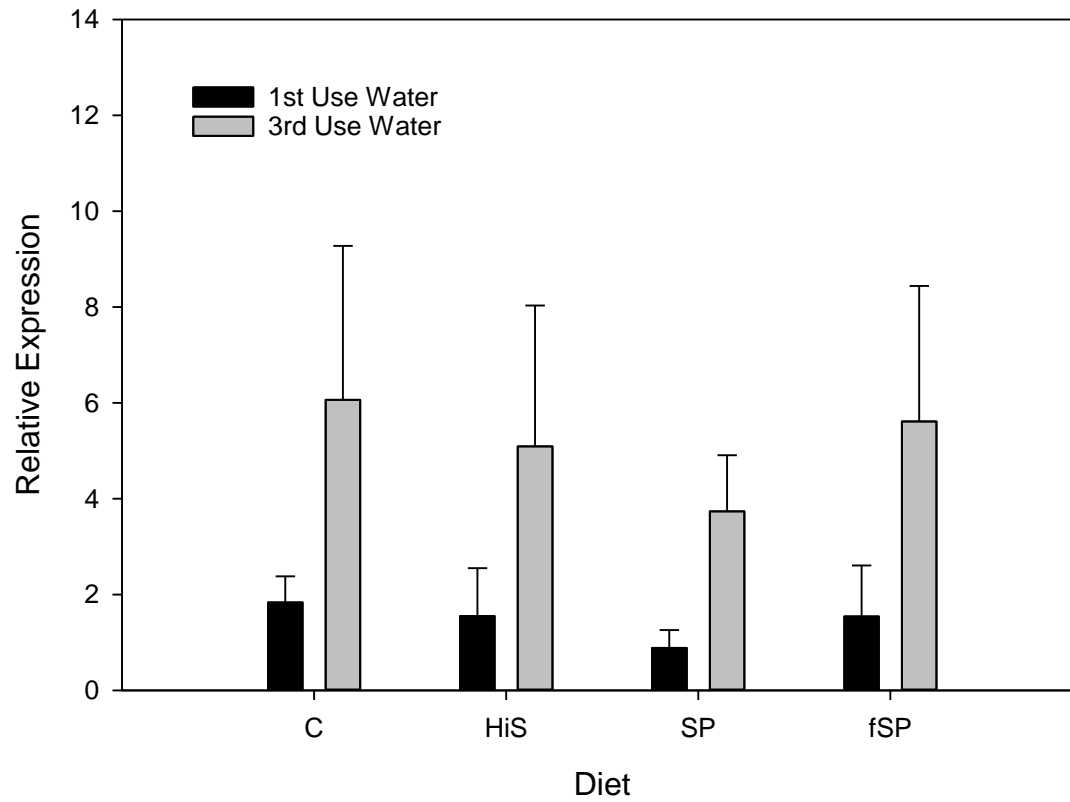

**Figure S5.** Relative expression (versus the reference gene,  $\beta$ -actin) of CYP1a in gill of rainbow trout fed different experimental feeds and reared in 1<sup>st</sup> use or 3<sup>rd</sup> use water. C = fishmeal control; fSP = fermented soy protein concentrate; HiS = high soybean meal; SP = soy protein concentrate.

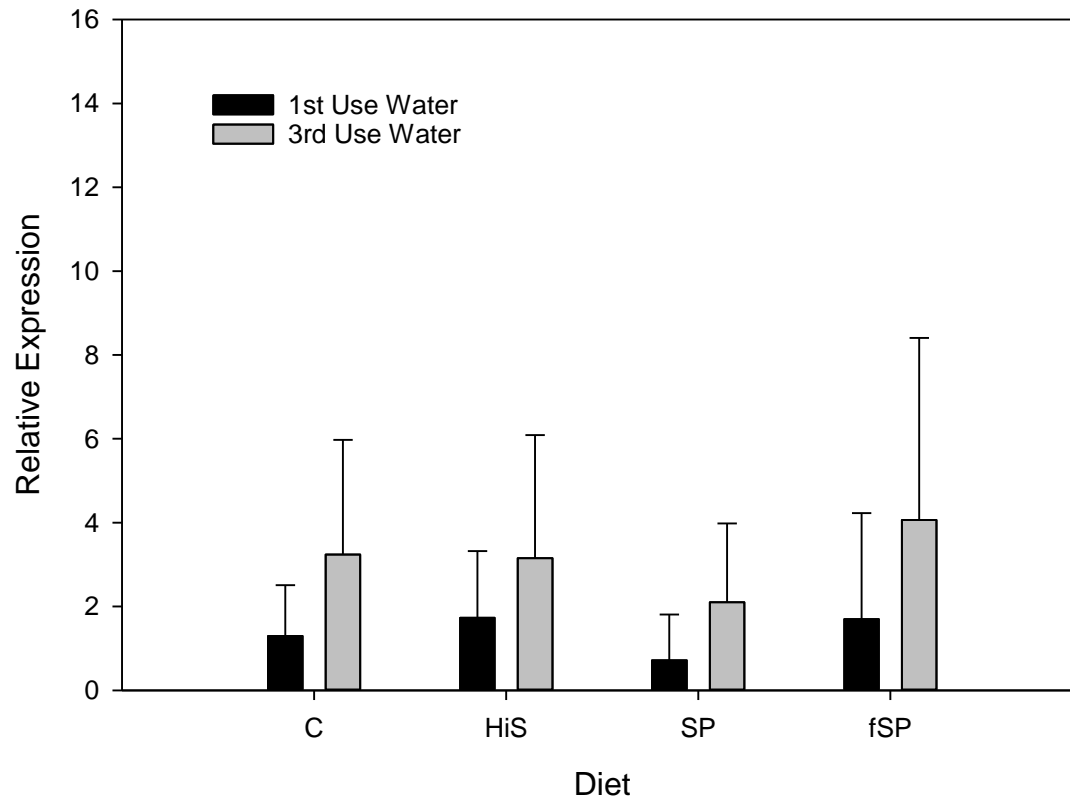

**Figure S6.** Relative expression (versus the reference gene,  $\beta$ -actin) of G6PH in gill of rainbow trout fed different experimental feeds and reared in 1<sup>st</sup> use or 3<sup>rd</sup> use water. C = fishmeal control; fSP = fermented soy protein concentrate; HiS = high soybean meal; SP = soy protein concentrate.

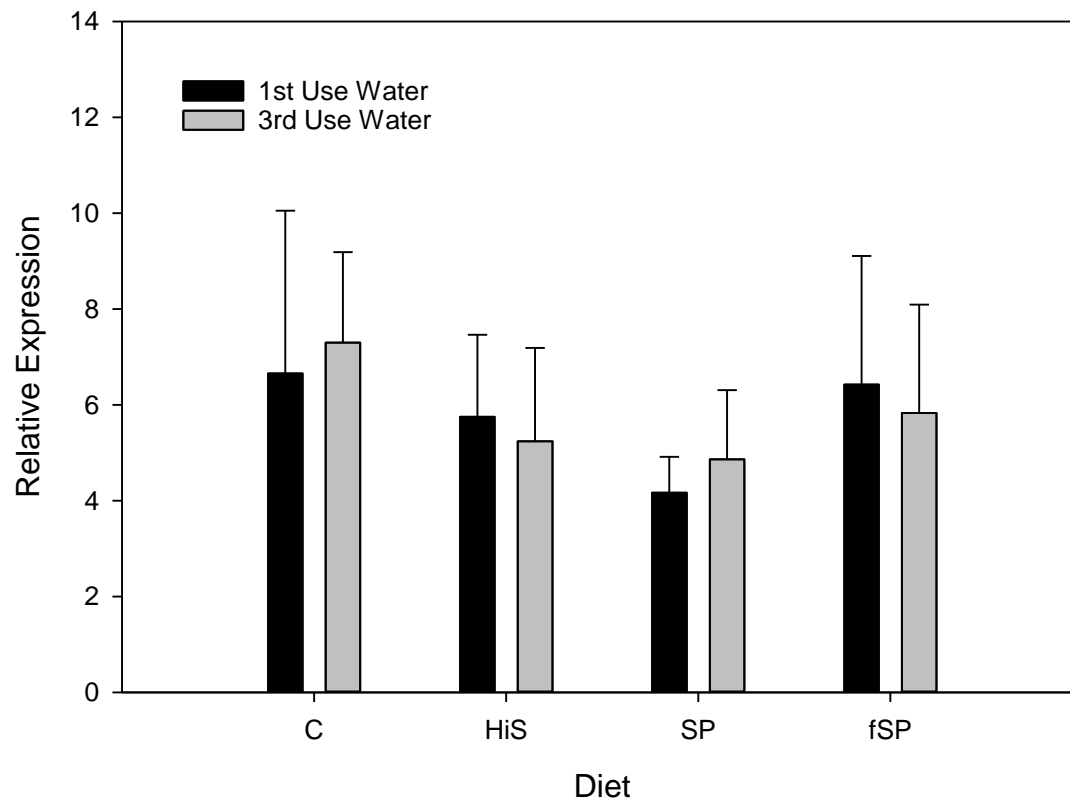

**Figure S7.** Relative expression (versus the reference gene,  $\beta$ -actin) of GADD45A in gill of rainbow trout fed different experimental feeds and reared in 1<sup>st</sup> use or 3<sup>rd</sup> use water. C = fishmeal control; fSP = fermented soy protein concentrate; HiS = high soybean meal; SP = soy protein concentrate.

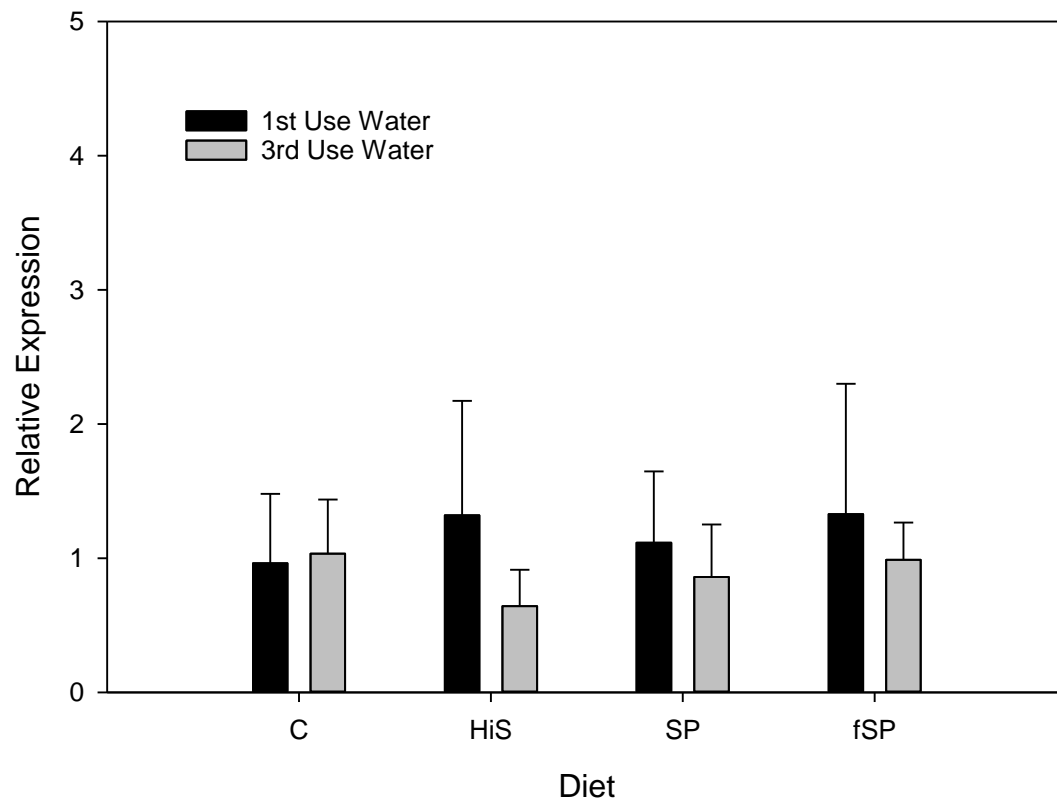

**Figure S8.** Relative expression (versus the reference gene,  $\beta$ -actin) of IRF-1 in liver of rainbow trout fed different experimental feeds and reared in 1<sup>st</sup> use or 3<sup>rd</sup> use water. C = fishmeal control; fSP = fermented soy protein concentrate; HiS = high soybean meal; SP = soy protein concentrate.

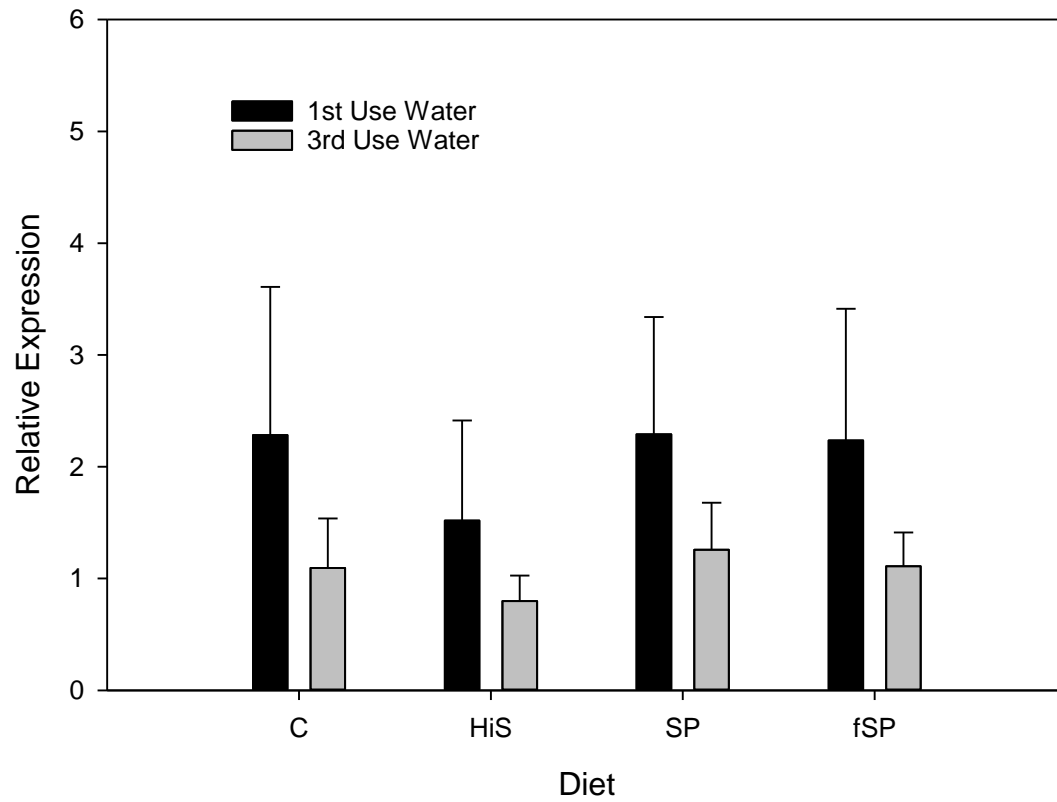

**Figure S9.** Relative expression (versus the reference gene,  $\beta$ -actin) of FK506BP2 in liver of rainbow trout fed different experimental feeds and reared in 1<sup>st</sup> use or 3<sup>rd</sup> use water. C = fishmeal control; fSP = fermented soy protein concentrate; HiS = high soybean meal; SP = soy protein concentrate.

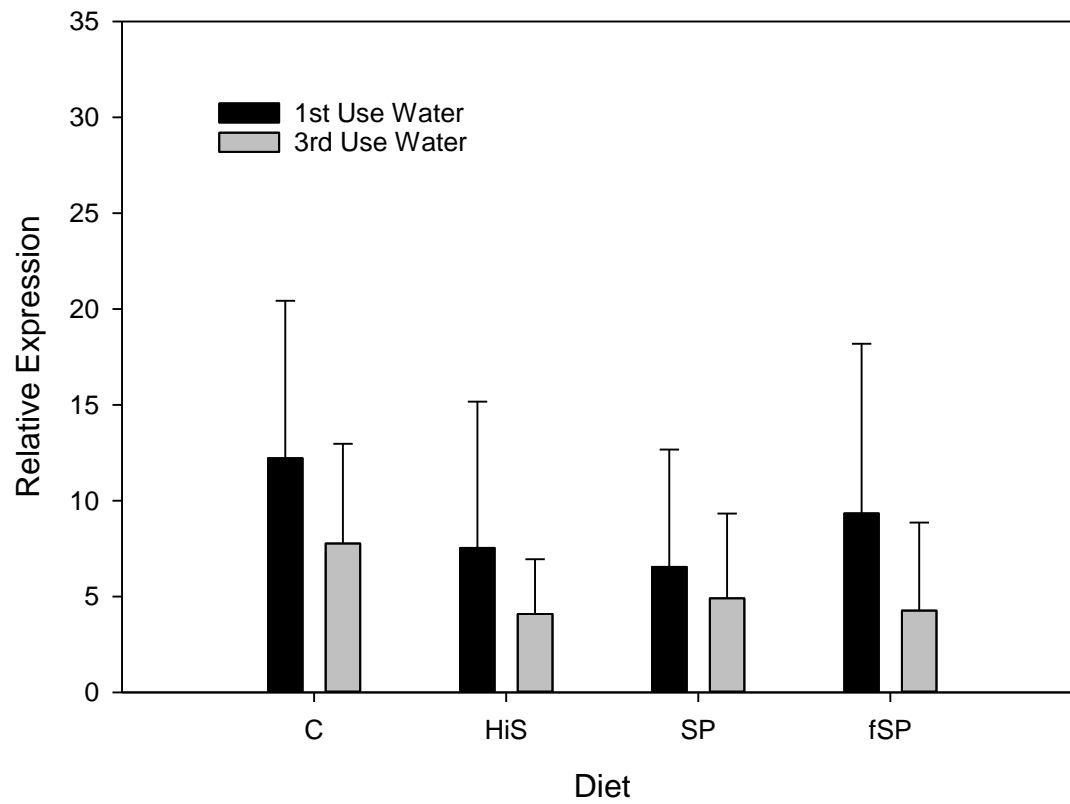

**Figure S10.** Relative expression (versus the reference gene,  $\beta$ -actin) of DIO2 in liver of rainbow trout fed different experimental feeds and reared in 1<sup>st</sup> use or 3<sup>rd</sup> use water. C = fishmeal control; fSP = fermented soy protein concentrate; HiS = high soybean meal; SP = soy protein concentrate.

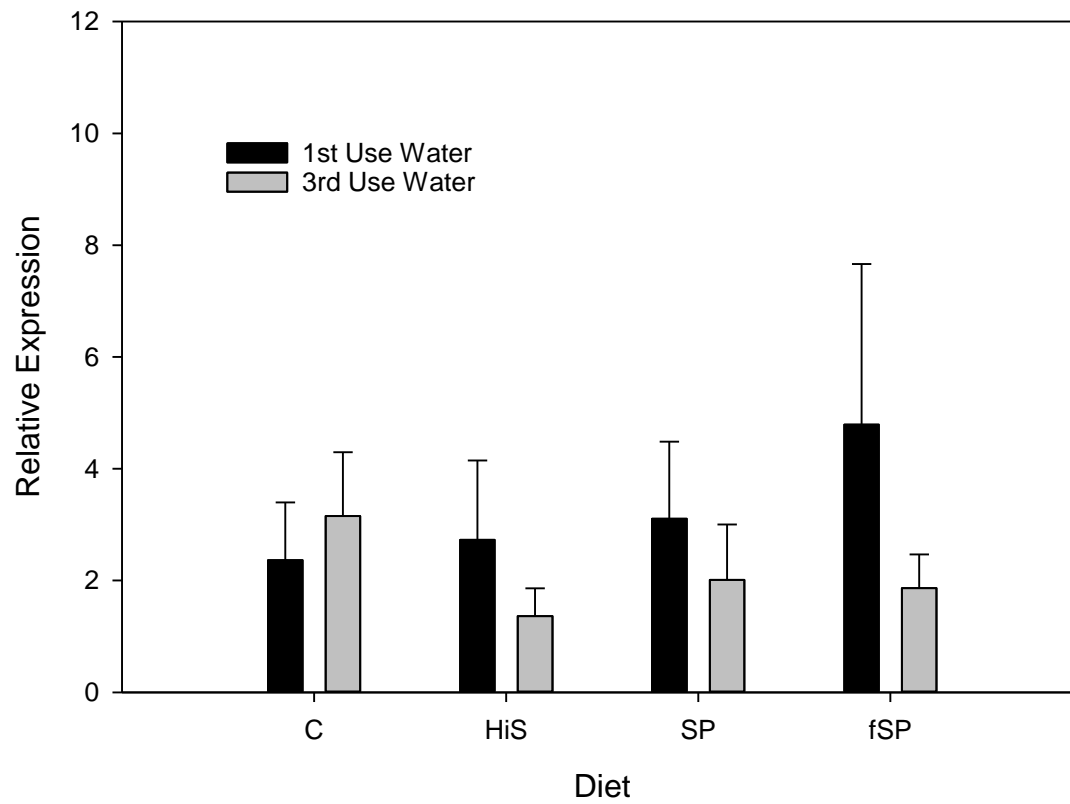

**Figure S11.** Relative expression (versus the reference gene,  $\beta$ -actin) of REGPS in liver of rainbow trout fed different experimental feeds and reared in 1<sup>st</sup> use or 3<sup>rd</sup> use water. C = fishmeal control; fSP = fermented soy protein concentrate; HiS = high soybean meal; SP = soy protein concentrate.

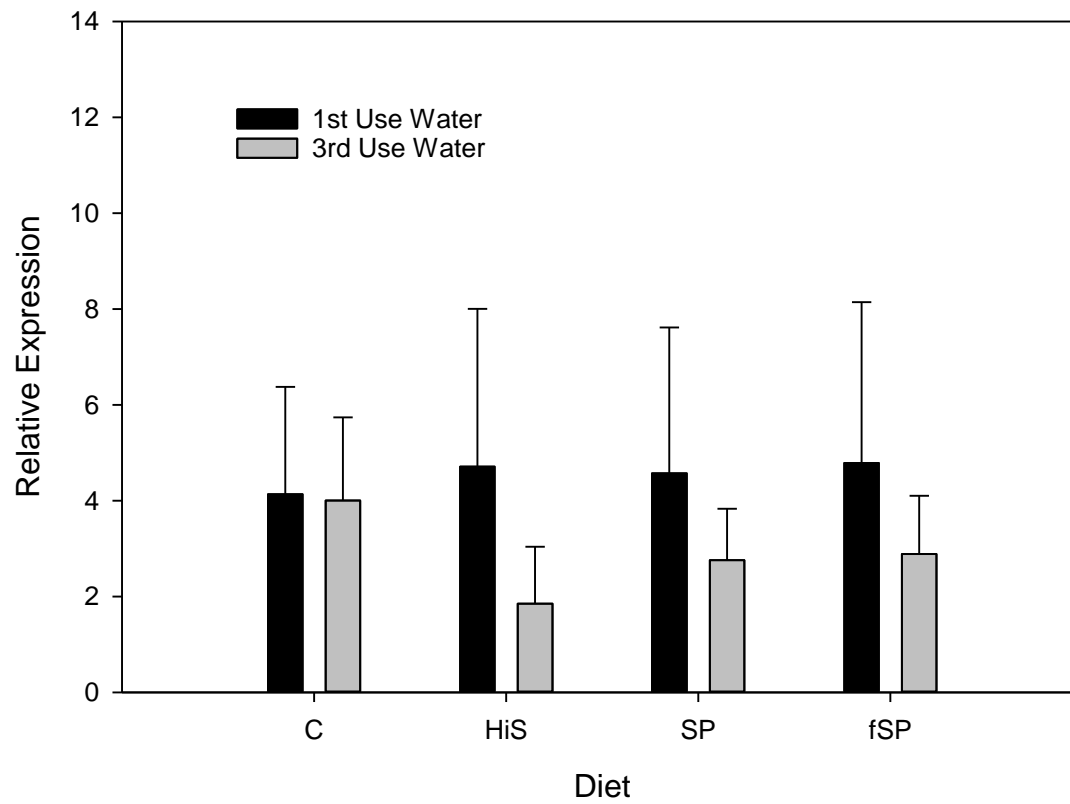

**Figure S12.** Relative expression (versus the reference gene,  $\beta$ -actin) of CYP1a in liver of rainbow trout fed different experimental feeds and reared in 1<sup>st</sup> use or 3<sup>rd</sup> use water. C = fishmeal control; fSP = fermented soy protein concentrate; HiS = high soybean meal; SP = soy protein concentrate.

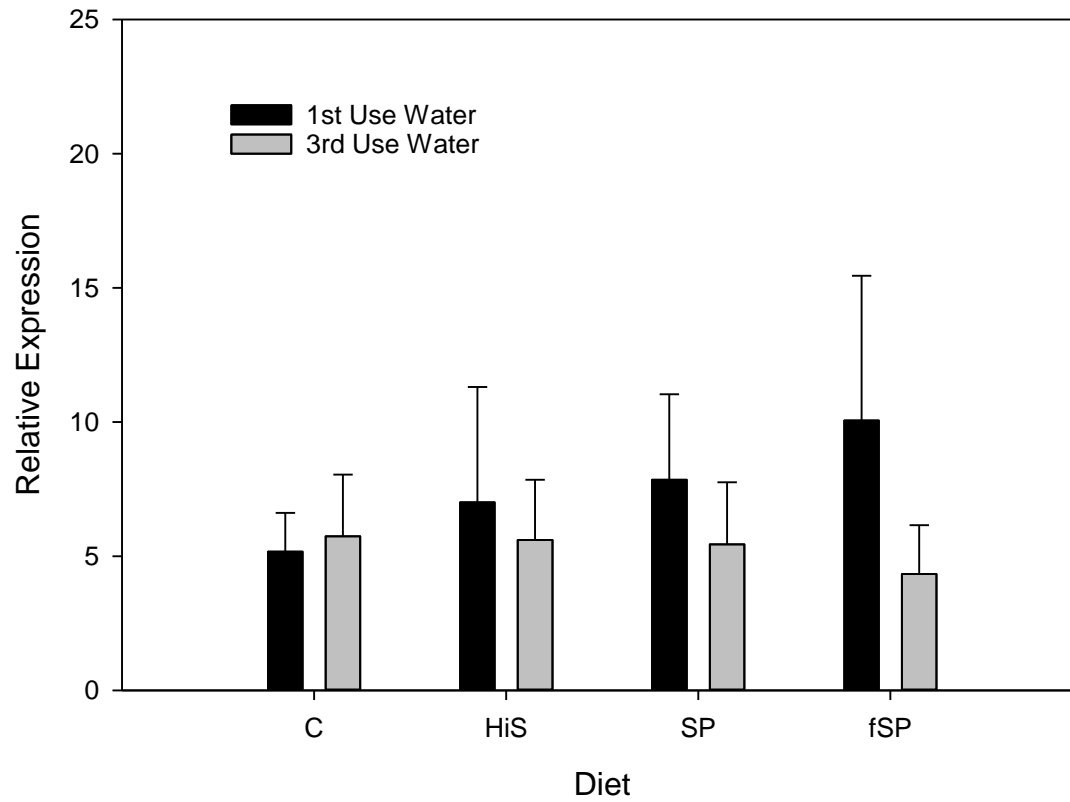

**Figure S13.** Relative expression (versus the reference gene,  $\beta$ -actin) of G6PH in liver of rainbow trout fed different experimental feeds and reared in 1<sup>st</sup> use or 3<sup>rd</sup> use water. C = fishmeal control; fSP = fermented soy protein concentrate; HiS = high soybean meal; SP = soy protein concentrate.

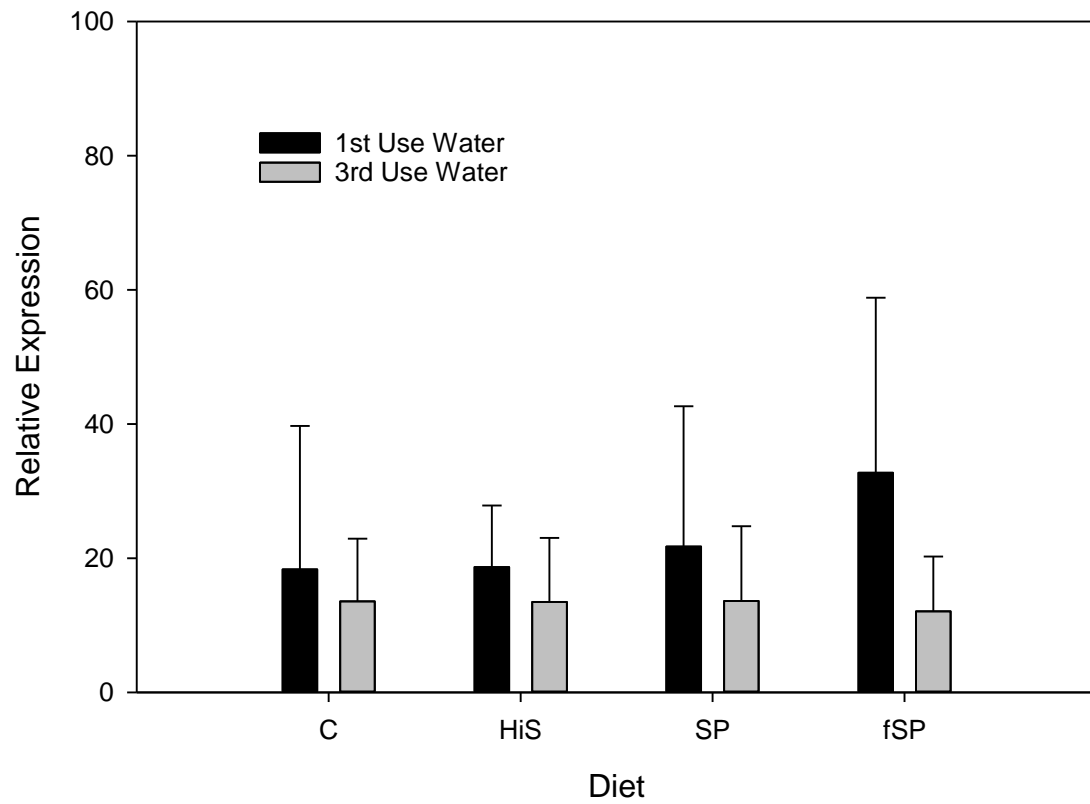

**Figure S14.** Relative expression (versus the reference gene,  $\beta$ -actin) of GADD45A in liver of rainbow trout fed different experimental feeds and reared in 1<sup>st</sup> use or 3<sup>rd</sup> use water. C = fishmeal control; fSP = fermented soy protein concentrate; HiS = high soybean meal; SP = soy protein concentrate.
